# Supplementary material for: Proposal for the Inclusion of Tobacco Use in Suicide Risk Scales: Results of a Meta-Analysis
Source: Int J Environ Res Public Health. 2021 Jun 5;18(11):6103. doi: 10.3390/ijerph18116103 (PMC8201119; doi:10.3390/ijerph18116103)
Supplement: Supplementary file 1 [file ijerph-18-06103-s001.zip › Supplementary Materials.pdf]

(a) Former Smokers:

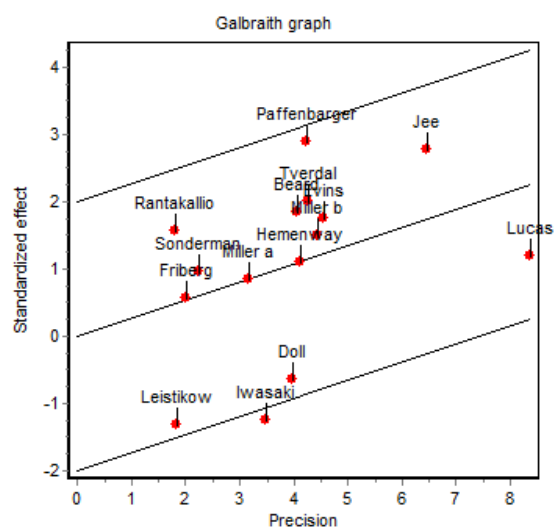

(b) Current Smokers:

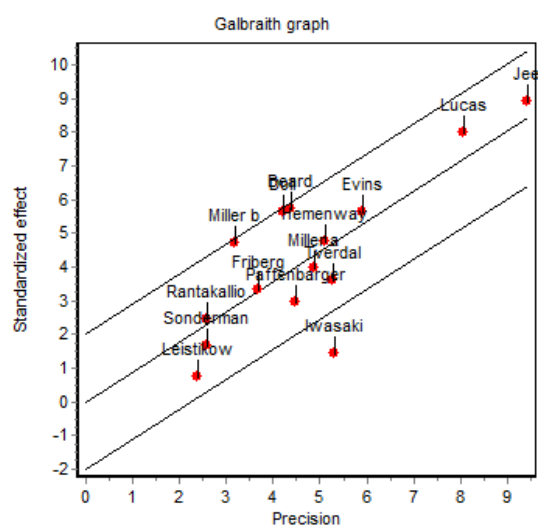

(c) Smoker Women:

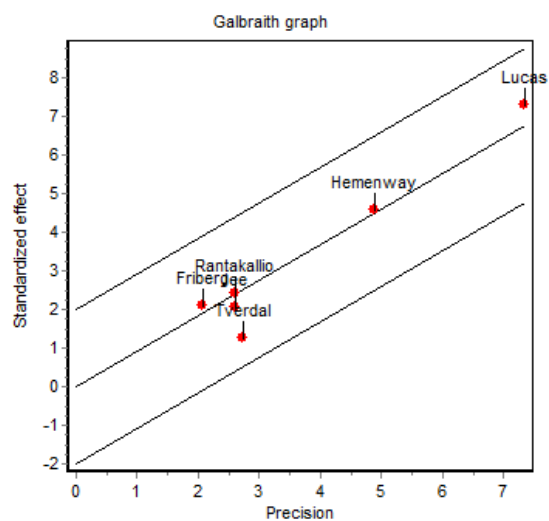

(d) Smoker Men:

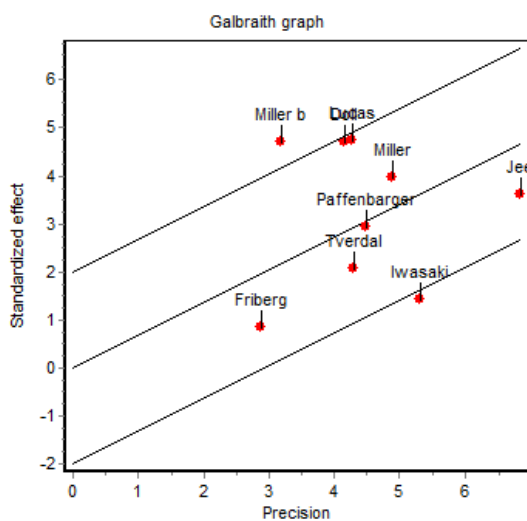

Figure S1. Galbraith graphs of suicide in former, current, female, and male smokers.

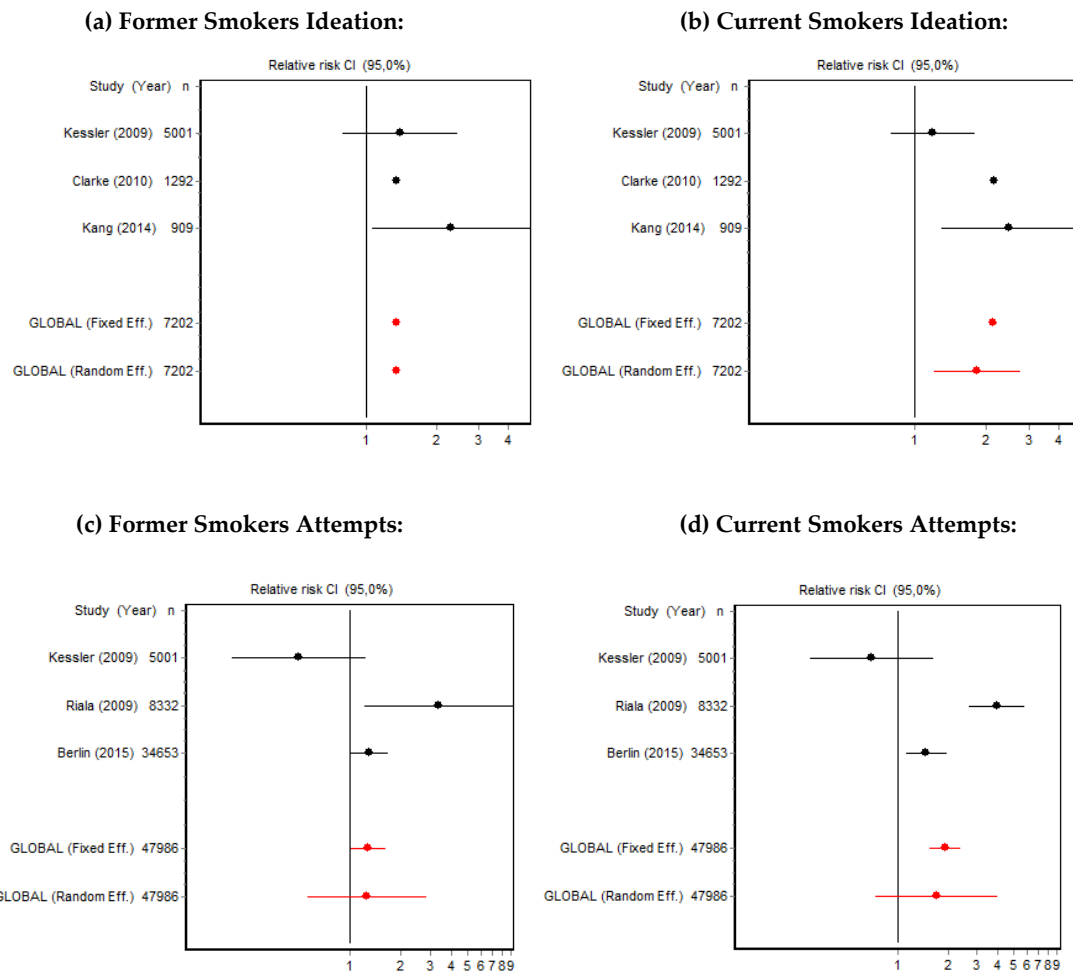

**Figure S2.** Forest Plots of suicidal ideation and attempts in former and current smokers.

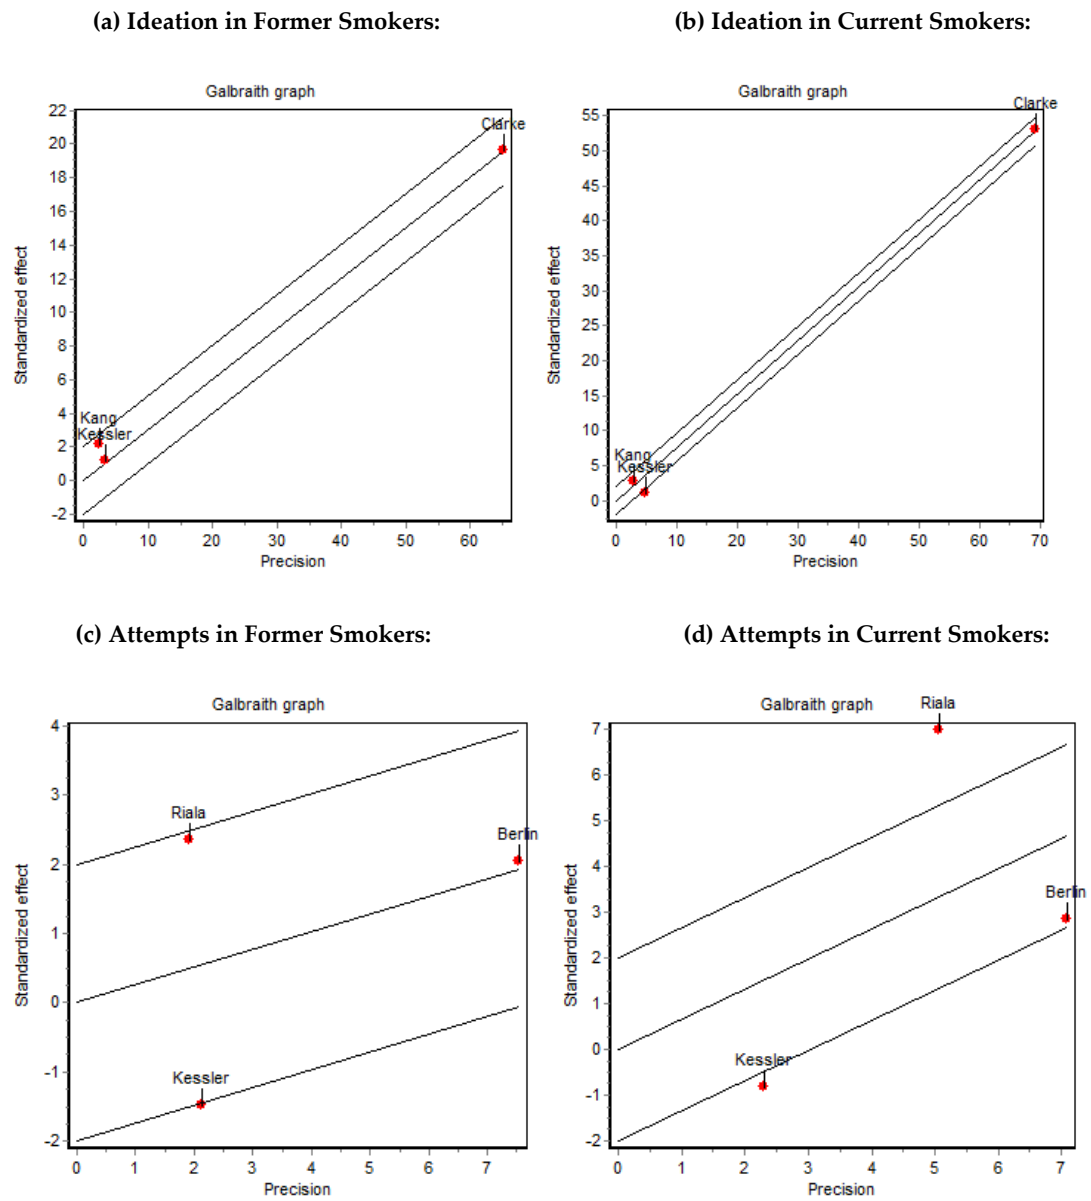

Figure S3. Galbraith graphs of suicidal ideation and attempts in former and current smokers.

(a) First meta-analysis:

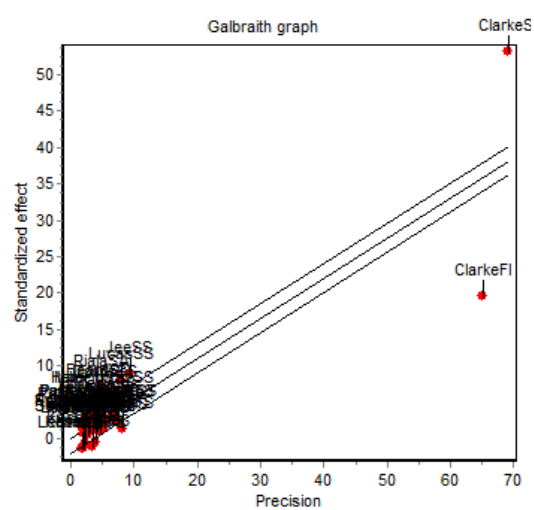

(b) Meta-analysis without Clarke (2010):

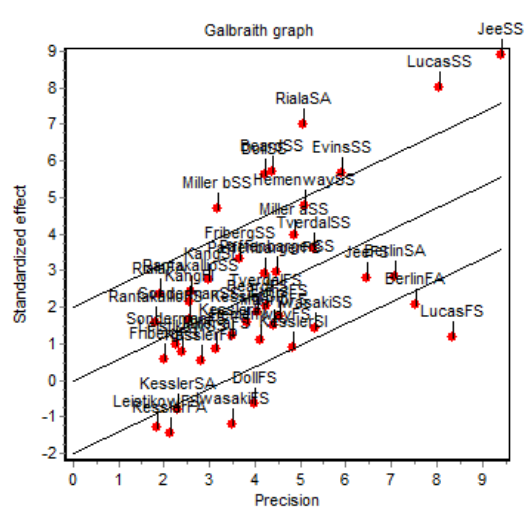

Figure S4. Galbraith graphs of all suicidal behaviours in former and current smokers.

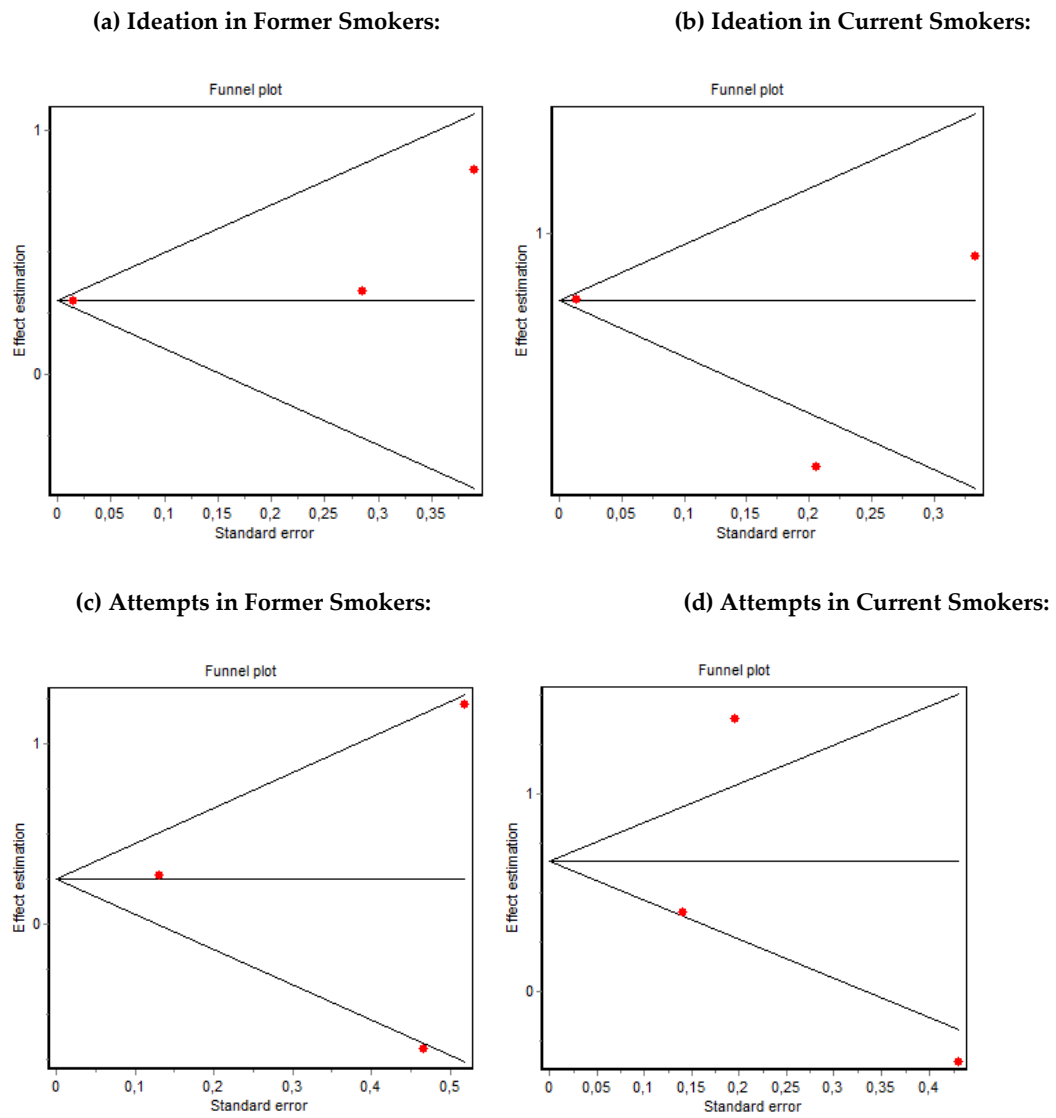

**Figure S5.** Funnel plots of suicidal ideation and attempts in former and current smokers.

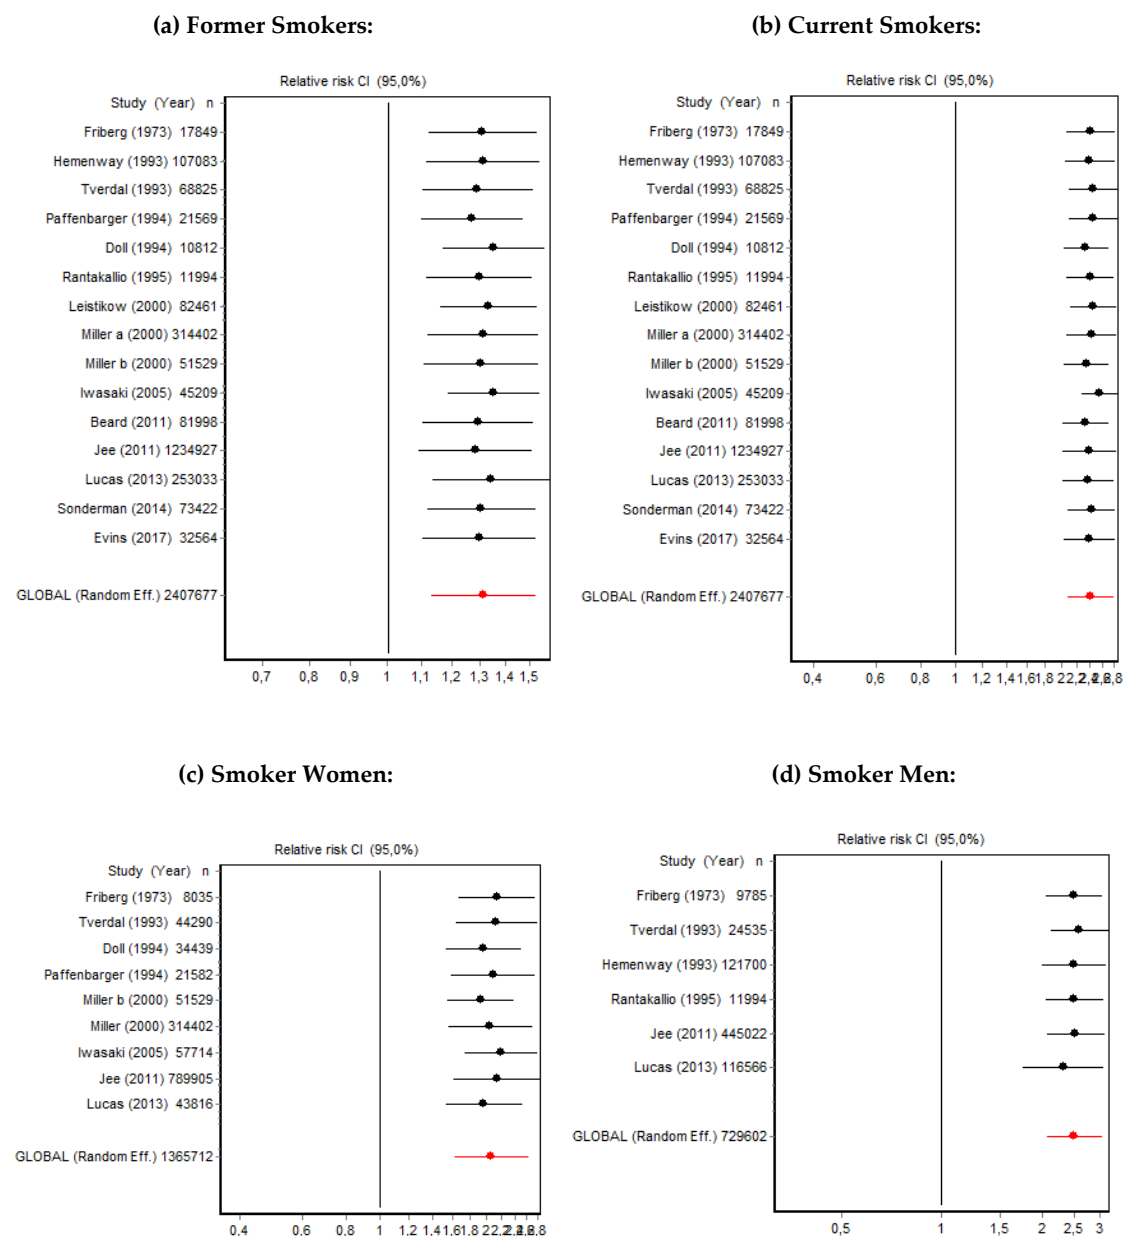

**Figure S6.** Influence graphs of suicide in former, current, female, and male smokers.

**(a) Ideation in Former Smokers:**

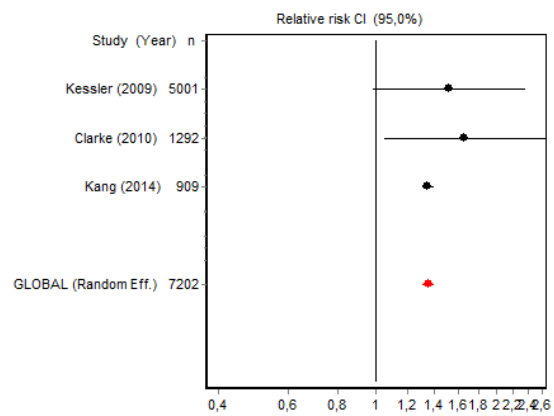

**(b) Ideation in Current Smokers:**

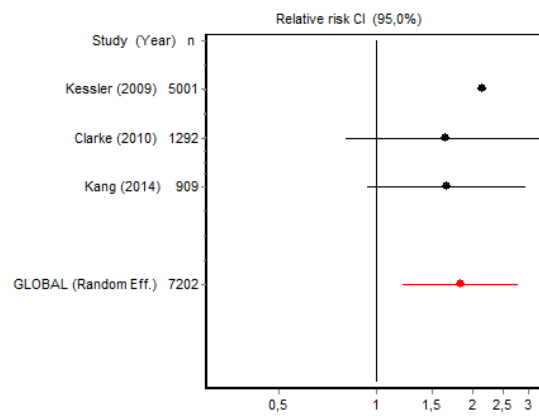

**(c) Attempts in Former Smokers:**

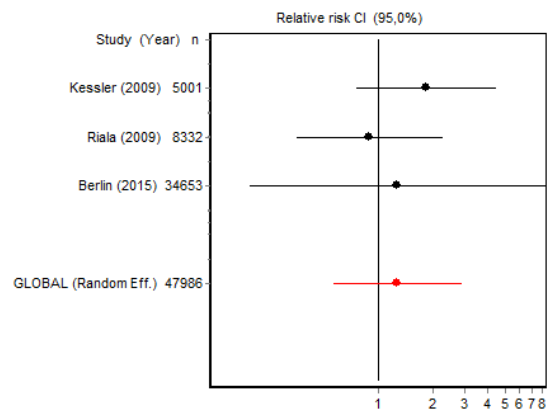

**(d) Attempts in Current Smokers:**

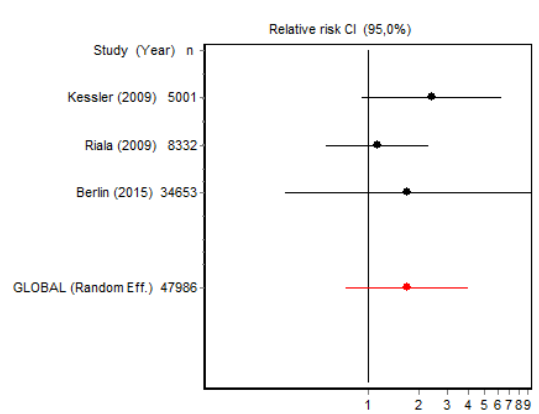

**Figure S7.** Influence graphs of suicidal ideation and attempts in former and current smokers.

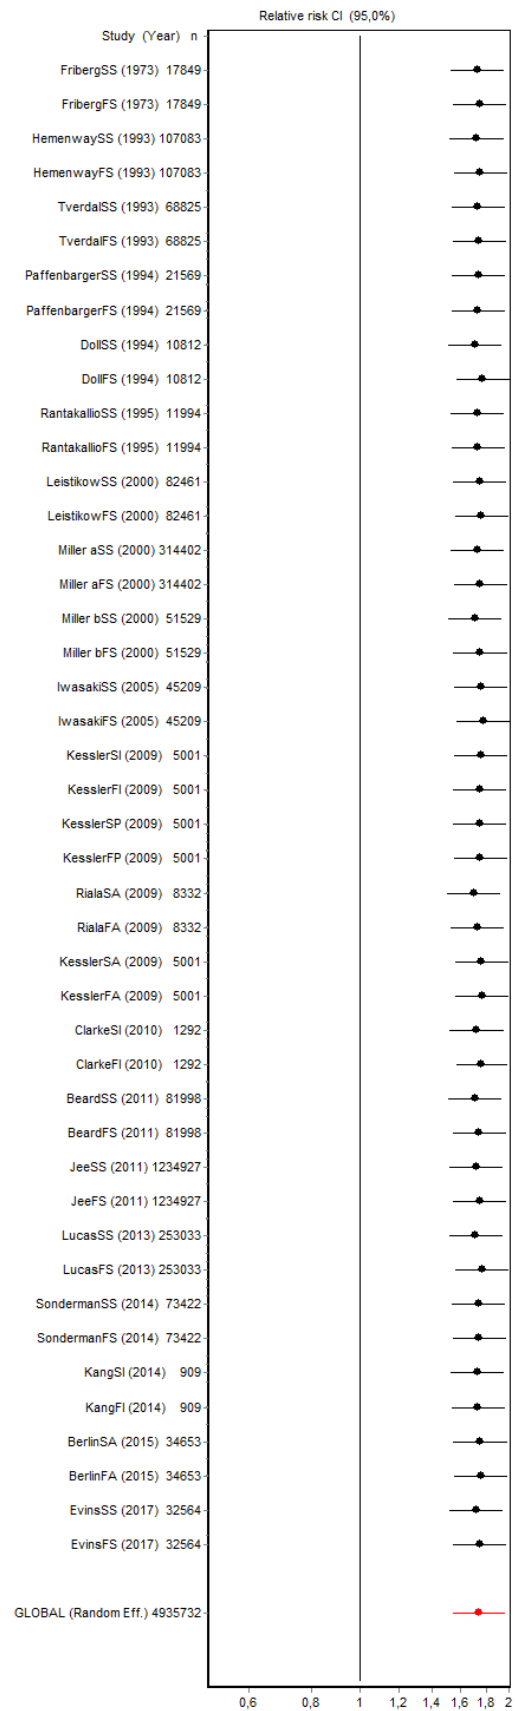

**Figure S8.** Influence graph of all suicide behaviours in former and current smokers.
